# Supplementary material for: Ability of functional performance assessments to discriminate athletes with and without chronic ankle instability : a case-control study
Source: PeerJ. 2022 May 27;10:e13390. doi: 10.7717/peerj.13390 (PMC9150691; doi:10.7717/peerj.13390)
Supplement: Supplemental Information 1 [file peerj-10-13390-s001.xlsx]

## Sheet: CAI athletes
Sr. no.	Age	Gender	30 M	MICODT	COD	ROM PF	ROM DF	ROM INV	ROM EVE	Strength PF	Strength DF	Strength INV	Strength EVE	SHRT	MSHRT
1	20	0	5.5	12.5	5.7	39	38.6	37	23	16.6	17.3	8	6.6	40	37
2	18	0	5.8	15.6	6.5	38.6	37.6	35.3	16	12	8.3	2.3	3.6	18	34
3	19	0	5.5	15	6	44.6	33	34.6	16	10.6	7.6	7.6	5.3	33	40
4	24	1	5.2	13.7	5.6	36.3	32.6	36.6	17	10.3	8	5.6	5.3	20	60
5	24	0	6.2	14.4	5.6	42.3	34	38	18.3	10.6	8.3	5	5	28	28
6	19	1	5.4	13.8	5.1	41.3	33.6	43.6	14.3	7.3	7	6.3	5.3	29	39
7	26	1	5.6	14	6	35.3	35	38	19	14.3	9	8	6.6	31	55
8	20	1	5.8	14.5	6.1	42.3	34	37	15.3	10.6	8.3	5	4	25	25
9	19	0	7.5	14	5	42.3	32.3	43.3	14.3	7	7	6.3	5.3	18	19
10	21	0	5.2	13.3	5.4	39	33	36	15.6	14	10	6.6	6	35	100
11	24	0	5.3	14.4	5.4	36.3	32.6	36.6	17	10.3	8	5.6	5.3	20	60
12	26	0	5.7	14.7	5.5	36.6	34	36	18.3	14	10.6	7	5.6	35	54
13	20	1	5.5	13.8	5.5	40	34.4	34.6	18	13	9	7.3	5.6	32	54
14	20	1	5.1	13.9	6.3	34.3	37.3	37.6	20.6	17.3	11	5.3	6	29	50
15	21	0	5.6	14.6	5.5	37.6	36	35	18.3	13	11	7	6	35	60
16	19	0	5.5	14.1	5.7	37	33	34.6	18.3	10.6	9	6	6.3	29	45
17	27	0	4.8	14.1	6	40	34	38.6	17.6	17.6	14	6.6	4.3	22	34.2
18	20	0	5.8	14.5	5.8	31.6	34.3	35	17.3	14	11.6	5.3	5.6	25	18.05
19	20	0	5.6	13.5	5.9	37.3	36	36.3	14.6	12	13.6	6	6.6	23	31
20	23	0	6.1	15.9	6.5	39.3	33.3	38.3	18	13	6.6	6	5.3	38	18
21	27	0	5.4	15.4	5.8	46	32	33	14.6	9	6.3	6	6.3	20	78
22	27	0	6.8	15.6	6.8	35.6	42	35	14.6	14	15	10	4.6	54	62
23	25	0	6.5	14.1	5.8	39	34	36.6	18	9	11.6	6.6	5	36	75
24	21	1	6.6	15.8	6.6	40	34.3	37.6	14.6	14	10.6	8	5.3	35	19
25	18	0	5	15	5.7	41.6	32	37.6	14.6	12	9.6	5	5.3	22	28
26	23	0	5.4	13.8	5.6	37.3	32.6	36.3	20.3	12	10.6	7	5.3	34	63
27	20	0	7.1	14.2	5.5	39	35	36.3	15.3	6	8	5	4.6	30	23
28	24	1	5.8	14.6	6.7	42.3	32.6	38.3	14.6	13.3	12.6	7	5.3	32	45
29	19	1	5.5	14.2	5.2	39.3	37	43	20	16	11.6	5	4.3	28	28
30	19	0	5.7	15.2	6.8	41.3	37	41.3	17.6	9.6	12.6	4.6	6.3	35	25
31	21	1	5.1	13.9	6.3	37.3	38	38.3	18.3	9.3	11	8	4.3	36	34
32	21	1	4.8	15.8	5.6	36.6	33	35.3	15.3	13.3	9	5	4.6	24	22
33	24	1	5.5	15.3	6.3	38.6	33.3	41.3	16.6	15.3	10.6	5	5.6	21	20
34	23	0	5	14.6	5.5	39	34.6	48	14.6	13.6	8	7	5.3	28	34
35	26	0	6.5	15.7	5.9	36.6	37.6	33.6	18.6	16	10.6	5.6	5	31	26
36	18	0	5.8	14.2	5.8	41.6	32	38	15	12	11.6	5	4.6	25	28
37	25	0	5.6	15.7	6	40	32.6	37.3	16.3	7.3	8	4.6	4.6	20	12
38	22	0	5.6	14.9	5.5	38.3	35.3	33.3	16	17	13.6	8.6	5.3	30	54
39	25	0	5.8	13.8	5.8	29.3	35	34.6	13	14	8.6	6.6	4.3	40	17.7
40	21	1	5.3	13.6	5.3	40	36.6	35	19.6	15	13.3	5.6	6	38	18.4
41	24	1	6.2	14.1	6	34.3	24	35.3	18.3	5.6	13.6	5.3	6	23	31.5
42	22	1	4.4	15.5	5.1	40	33	39	17.6	13.3	9.6	6.3	5	37	42
43	21	0	5.8	13.8	5.8	26	35	35.6	14.6	11	8.3	5.3	3.6	25	16.2
44	19	0	6.5	15.7	6	38.3	33.6	36.6	18.6	16.3	11.3	4.3	4.3	28	24
45	24	0	5.5	15	6	37	37	35.6	19.6	12.3	11	5	4.6	35	43
46	22	0	5.6	14.3	5.6	33.6	36.3	36.6	18	12.3	12	6.3	5.6	33	39
47	21	1	5.5	14.8	5.5	37.3	30.6	36.6	19	12	13	7	5	30	35
48	22	1	4.8	14.9	5	38	37	34.6	17.3	15	13.6	8.3	7.3	55	61
49	18	1	5.6	13.6	6.2	46.6	36	36	13.6	13.3	13	8	6	25	35
50	22	1	5.7	14.2	5.8	41.3	33	40	16	12.3	12.3	5	5	26	25
51	21	1	5.5	15.6	5.9	41	32	35.6	16.6	9	8	5.3	4.3	21	15
52	19	0	6.1	14.7	6.3	37.3	32.6	38.6	19	13.3	12	5.3	4.3	28	28
53	24	0	5.7	13.9	5.1	36.6	37	35	17.3	7.3	8.3	6	3.6	35	32

## Sheet: Non CAI athletes
Sr. no.	Age	Gender	30 m	MICODT	COD	ROM PF	ROM DF	ROM INV	ROM EVE	Strength PF	Strength DF	Strength INV	Strength EVE	SLHRT	MSHLT
1	20	0	5.1	12.1	4.6	47.6	42.3	37.6	17	12.3	13.6	7.6	7.3	38	63
2	21	0	4.9	12.8	5.4	46.3	37	36.6	18.6	14	13	6.6	7	31	90
3	26	0	4.9	12.4	3.9	44.6	46	40	17.3	14.6	11.3	7.6	8	40	64
4	23	0	3.8	12.9	4.3	43.3	42.6	38	16.6	16	12	9.3	9.6	32	30
5	21	0	4.2	12.4	5.5	51.3	42	39	15.6	14.6	11.6	8	7	49	65
6	19	0	5.6	11.5	4.9	40.6	36	40	17.6	9.3	12.6	7	9.3	38	45
7	22	0	4.3	11.1	4.8	34.6	45.3	37.6	17	15.3	14	9.3	9.6	50	61
8	23	0	6	13.2	5.4	36.3	43.6	39	18.3	11	12.6	8	9.3	39	39.6
9	20	0	4.1	12.4	5	46.6	35	36.6	17.3	12.6	11.6	7	6.3	40	35
10	18	0	3.9	11.2	4.7	39	40.3	37	17.6	13.3	15	8	9	37	96
11	19	0	3.9	11.3	5	43.3	40.6	38	16	13.6	6.3	5.6	6.6	32	28
12	21	0	4.3	11.7	5.2	42.6	37.6	37.3	13.3	14.3	12.3	6.3	6.6	50	25
13	23	0	5.7	13.9	5.7	36.3	36.3	36.6	17.6	12.6	6.6	8	7.6	39	40
14	24	0	5.1	12.5	4.1	39	39	35	20	14	13.6	9.6	9	40	60
15	21	0	4.7	12.6	5.3	36.1	41.3	36	16.6	13.3	8	7.3	9	39	60
16	22	0	4.6	11.8	4.6	37	35.6	35	17.6	12.6	14	6	8	34	48
17	18	0	4.6	11.7	4.7	40.3	46	35.3	19	16.3	12.6	7	9.6	30	16
18	22	1	5.2	12.9	5.1	45	39	37	19.6	13.6	11	7	7	46	80
19	23	1	5.8	13.1	5.7	44.6	35.6	36.3	17	8	5.6	6	8	39	50
20	23	1	4.9	12.7	5.6	46	36.3	35.3	17.3	9	6.6	4.6	5.3	60	99
21	18	0	4.7	11.5	5.2	38.3	47	39	15.6	9	8.3	6.6	7	41	4.6
22	18	0	4	11.2	4.6	38.6	39.6	35.6	19.3	16	15.6	9.6	8	58	60
23	26	1	5.4	14.3	5.2	35.6	37.6	34	18.4	15.3	16	8.3	9.3	24	74
24	20	1	5.7	13.1	6	43.6	45.6	36.3	19	13.3	13.6	9.3	8.3	39	49
25	22	1	5.1	12.6	5.2	41	41.6	37.3	20	12	14	8	8.3	37	55
26	20	0	6	13.6	5.9	49	38	36.6	15.6	15.3	12	8	9.3	22	35
27	18	0	4.7	12	4.8	38	43.6	39	20	12.3	12	5	6	25	30
28	23	1	5.2	13.3	6.2	45.6	37	37.6	19.6	8	6.3	5	5.6	31	61
29	20	0	4.8	12.8	5.2	42.3	47.3	33	19	18.6	13.3	10	11	18	36.2
30	24	0	5.3	14.1	4.5	42	37	38	16.6	11	7	7.6	6.3	39	70
31	22	1	6.7	15.5	6.1	41.3	36.6	41.6	20.3	8.3	9	4.6	5	30	19.2
32	20	1	5.2	13.2	5.5	43.3	37.6	37.6	17.3	13	8.6	7.3	7.6	40	38
33	22	1	5.7	12.4	5.2	45.3	36	37	15.6	13.6	10	9	9	37	23
34	21	0	5.1	12.3	5.5	42	39.6	39.6	15	15.3	13.3	6.6	8.3	35	50
35	22	0	5.2	12.2	5.2	38.3	33.6	36.6	18.6	16.3	11.3	4.3	4.3	28	24
36	24	0	5.3	13.5	6	41.3	33	40	16	12.3	12.3	5	5	26	25
37	22	1	5.5	13.9	5.3	41	32	35.6	16.6	9	8	5.3	4.3	21	15
38	22	0	4.6	12.2	4.9	37.3	30.6	36.6	19	12	13	7	5	30	35
39	22	0	5.1	12.3	5.1	26	35	35.6	14.6	11	8.3	5.3	3.6	25	16.2
40	21	0	5.5	12.5	5.5	37	34	35.6	17	10.3	6.6	7	7.3	55	105
41	21	0	4.7	12.6	5.3	38	37.6	35.6	17	9.6	7	7.3	7	40	60
42	18	0	4.3	11.7	5.2	39.6	35.6	36.3	16.3	9.3	7.6	7.6	6.3	40	67
43	19	0	4	11.5	4.6	28.6	44	37.6	16.3	17	14.6	10.6	11.6	35	58.1
44	21	1	5.7	13.2	5.5	46.6	38	39	16	17.6	12.6	9.6	12	24	75.4
45	18	0	4.7	11.5	5.2	38.6	38.3	40	14.3	9.6	6.3	5.3	4.6	28	40
46	26	0	4.5	13	5.2	36.6	41.3	36	16.6	13.3	8	7.3	9	39	60
47	22	1	4.7	13.1	4.3	42.6	37.8	37.3	13.3	14.3	12.3	6.3	6.6	50	50
48	21	1	4.7	12.3	5.1	35.6	37.6	34	18.4	15.3	16	8.3	9.3	36	75
49	20	1	5.6	12.4	5.4	39	41	37.3	20	13	14	8	8.3	38	64
50	22	1	5.3	12.9	4.1	38.6	39.6	35.6	19.3	16	15.6	9.6	8	58	61
51	20	0	4.6	12.6	5.3	38.6	39.6	38.6	20.3	14	13	9.6	8	36	55
52	19	0	5.7	12.5	5.6	40	35.6	36.3	18	9	8.3	7	7	38	50
53	21	0	4.3	12.1	5	44	40	36.3	19	8	8	7.3	7	47	65
